# Supplementary material for: A First Insight on the Population Structure of Mycobacterium tuberculosis Complex as Studied by Spoligotyping and MIRU-VNTRs in Santiago, Chile
Source: PLoS One. 2015 Feb 11;10(2):e0118007. doi: 10.1371/journal.pone.0118007 (PMC4324903; doi:10.1371/journal.pone.0118007)
Supplement: S2 Table — (PDF) [file pone.0118007.s005.pdf]

| IsoNumber       | Year | Spoligotype Description        | Octal code      | Sublineage | Lineage | SIT | MIRU12       | 12-MIT | Lineage (MIRU-VNTR plus) | Sex / Age |
|-----------------|------|--------------------------------|-----------------|------------|---------|-----|--------------|--------|--------------------------|-----------|
| CHL022011000041 | 2011 | □□□□□□□□□□□□□□□□□□□□□□□□□□□□□■ | 000000000003771 | Beijing    | Beijing | 1   | 224325173533 | 229    | Beijing                  | M/56      |
| CHL022011000032 | 2011 | □□□□□□□□□□□□□□□□□□□□□□□□□□□□■  | 000000000003771 | Beijing    | Beijing | 1   | 223325173333 | 721    | Beijing                  | F/91      |
| CHL022012000060 | 2012 | ■□□■                           | 677777607760771 | LAM1       | LAM     | 20  | 224326163321 | 375    | LAM                      | M         |
| CHL022011300033 | 2011 | ■                              | 776177607760771 | LAM3       | LAM     | 33  | 224326133323 | 251    | LAM                      | M/31      |
| CHL022012100068 | 2012 | ■                              | 776177607760771 | LAM3       | LAM     | 33  | 224326133323 | 251    | LAM                      | M/24      |
| CHL022011000023 | 2011 | ■                              | 776177607760771 | LAM3       | LAM     | 33  | 224226133323 | 880    | LAM                      | F/29      |
| CHL022010000008 | 2010 | ■                              | 776177607760771 | LAM3       | LAM     | 33  | 224326133322 | 1670   | LAM                      | F/63      |
| CHL022013000091 | 2013 | ■                              | 776177607760771 | LAM3       | LAM     | 33  | 224326133322 | 1670   | LAM                      | M/27      |
| CHL022013000092 | 2013 | ■                              | 776177607760771 | LAM3       | LAM     | 33  | 224327153324 | 1678   | LAM                      | F/29      |
| CHL022011000038 | 2011 | ■                              | 776177607760771 | LAM3       | LAM     | 33  | 224226133023 | Or01   | LAM                      | F/36      |
| CHL022013000073 | 2013 | ■                              | 776177607760771 | LAM3       | LAM     | 33  | 224327133324 | Or02   | LAM                      | M/56      |
| CHL022013000074 | 2013 | ■                              | 776177607760771 | LAM3       | LAM     | 33  | 224126133323 | Or03   | LAM                      | M/31      |
| CHL022013000084 | 2013 | ■                              | 776177607760771 | LAM3       | LAM     | 33  | 224317133325 | Or04   | LAM                      | F/53      |
| CHL022013000094 | 2013 | ■                              | 776177607760771 | LAM3       | LAM     | 33  | 224316233325 | Or05   | LAM                      | F/27      |
| CHL022012000050 | 2012 | ■                              | 776377777760771 | S          | S       | 34  | 233324153224 | Or06   | S                        | M/59      |
| CHL022012100065 | 2012 | ■                              | 776377777760771 | S          | S       | 34  | 233225143322 | Or07   | S                        | M/45      |
| CHL022013000081 | 2013 | ■                              | 777737777760771 | T3         | T       | 37  | 224325143325 | 220    | X                        | F/60      |
| CHL022013100042 | 2013 | ■                              | 777737777760771 | T3         | T       | 37  | 223321153324 | 585    | H                        | M/52      |
| CHL022013100043 | 2013 | ■                              | 777737777760771 | T3         | T       | 37  | 223321153324 | 585    | H                        | F/51      |
| CHL022012000051 | 2012 | ■                              | 777737777760771 | T3         | T       | 37  | 223321153324 | 585    | H                        | M/3       |
| CHL022012000058 | 2012 | ■                              | 777737777760771 | T3         | T       | 37  | 223321153324 | 585    | H                        | F         |
| CHL022013000095 | 2013 | ■                              | 777737777760771 | T3         | T       | 37  | 223321153324 | 585    | H                        | M/50      |
| CHL022013000078 | 2013 | ■                              | 777737777760771 | T3         | T       | 37  | 224322153324 | 1677   | H                        | M         |
| CHL022011000017 | 2011 | ■                              | 777777347760471 | T4-CEU1    | T       | 39  | 224325143324 | 117    | X                        | M/28      |
| CHL022011000030 | 2011 | ■                              | 777777347760471 | T4-CEU1    | T       | 39  | 224325143224 | Or08   | LAM                      | M/29      |
| CHL022010000009 | 2010 | ■                              | 777777607760771 | LAM9       | LAM     | 42  | 124328153326 | 180    | LAM                      | F/93      |
| CHL022011000021 | 2011 | ■                              | 777777607760771 | LAM9       | LAM     | 42  | 124326153220 | 190    | LAM                      | F/42      |
| CHL022011000025 | 2011 | ■                              | 777777607760771 | LAM9       | LAM     | 42  | 124326153220 | 190    | LAM                      | M/88      |
| CHL022011000027 | 2011 | ■                              | 777777607760771 | LAM9       | LAM     | 42  | 124326153220 | 190    | LAM                      | M/44      |
| CHL022009100003 | 2009 | ■                              | 777777607760771 | LAM9       | LAM     | 42  | 224216143220 | Or09   | LAM                      | F/74      |
| CHL022009000010 | 2009 | ■                              | 777777607760771 | LAM9       | LAM     | 42  | 113326153226 | Or10   | LAM                      | F/50      |

[illegible]

[illegible]

[illegible]

(\*) Newly created SIT are highlighted by an asterisk (\*)
